# Supplementary material
Source: publisher figshare collection journal article supplement (https://sage.figshare.com/ndownloader/files/14375780)
Supplement: Supplementary file 1 [file 14375780]

## Part 2. More details about the product information of CHIs

| CHI name                     | Raw materials                                                                                                                                                              | Labeled efficacy                                                                                                            | Indications                                                                                                                                                                                                                                           |
|------------------------------|----------------------------------------------------------------------------------------------------------------------------------------------------------------------------|-----------------------------------------------------------------------------------------------------------------------------|-------------------------------------------------------------------------------------------------------------------------------------------------------------------------------------------------------------------------------------------------------|
| Compound<br>kushen injection | <i>Sophorae</i><br><i>Flavescentis</i><br><i>Radix</i> ,<br><i>Smilacis Glabrae</i><br><i>Rhizoma</i>                                                                      | Clearing away hot,<br>removing dampness,<br>cooling blood,<br>removing toxin,<br>resolving hard mass,<br>and relieving pain | Cancer pain, bleeding                                                                                                                                                                                                                                 |
| Shenqifuzheng<br>injection   | <i>Astragali Radix</i> ,<br><i>Ligustri Lucidi</i><br><i>Fructus</i>                                                                                                       | Tonifying Qi and<br>nourishing Yin                                                                                          | Fatigue, lack of strength, vertigo caused<br>by asthenia of pulmonosplenic Qi;<br>auxiliary treatment of the above<br>symptoms for lung cancer and gastric<br>cancer                                                                                  |
| Aidi injection               | <i>Mylabris</i> , <i>Ginseng</i><br><i>Radix Et Rhizoma</i> ,<br><i>Astragali Radix</i> ,<br><i>Acanthopanax</i><br><i>Senticosi Radix Et</i><br><i>Rhizoma Seu Caulis</i> | Clearing away hot,<br>removing toxin,<br>resolving stagnation and<br>dispersing masses                                      | Primary liver cancer, lung cancer, rectal<br>cancer, malignant lymphoma,<br>gynecological malignant tumors, etc.                                                                                                                                      |
| Kangai injection             | <i>Astragali Radix</i> ,<br><i>Ginseng Radix Et</i><br><i>Rhizoma</i> , <i>Sophorae</i><br><i>Flavescentis Radix</i>                                                       | Tonifying Qi and<br>strengthening<br>body resistance                                                                        | Primary liver cancer, lung cancer, rectal<br>cancer, malignant lymphoma,<br>gynecological malignant tumors;<br>neutropenia and thrombocytopenia;<br>chronic hepatitis B from various causes.                                                          |
| Huachansu<br>injection       | <i>Bufois Corium</i>                                                                                                                                                       | Removing toxin,<br>detumescence, and<br>relieving pain                                                                      | Middle and advanced cancer, chronic<br>hepatitis B etc..                                                                                                                                                                                              |
| Kanglaite<br>injection       | <i>Jobs tears Seed Oil</i>                                                                                                                                                 | Tonifying Qi,<br>nourishing Yin, and<br>resolving mass                                                                      | Unfavorable operation of Qi and yin<br>deficiency, spleen deficiency and<br>dampness retention with primary<br>non-small cell lung cancer and primary<br>liver cancer; has anti cachexia and<br>analgesic effects in patients with<br>advanced cancer |
| Javanica<br>oil              | <i>Bruceae Fructus</i>                                                                                                                                                     | Anticarcinogen                                                                                                              | Lung cancer, brain metastasis of lung                                                                                                                                                                                                                 |

|             |                                          |                           |                                          |
|-------------|------------------------------------------|---------------------------|------------------------------------------|
| emulsion    |                                          |                           | cancer and digestive system neoplasms    |
| injection   |                                          |                           |                                          |
| Xiaoai ping | <i>Marsdenia</i>                         | Clearing away heat and    | Esophageal cancer, gastric cancer, lung  |
| injection   | <i>tenacissima Caul</i>                  | toxic material, resolving | cancer, liver cancer; combination with   |
|             |                                          | phlegmand softening       | radiotherapy and chemotherapy as         |
|             |                                          | hard masses               | adjuvant therapy                         |
| Delisheng   | <i>Radix Ginseng,</i>                    | Supplementing Qi and      | Syndromes of Qi deficiency stasis on     |
| injection   | <i>Astragalus, venenum</i>               | strengthening the body    | middle-late stage primary liver cancer,  |
|             | <i>bufonis, cantharides</i>              | resistance, eliminating   | abdominal mass in right rib, pain of     |
|             |                                          | inflammation and          | fixed location, abdominal distension,    |
|             |                                          | dissipating stasis        | fatigue.                                 |
| Elemene     | $\beta$ -, $\gamma$ -, $\delta$ -elemene | /                         | Combined with routine regimen of         |
| injection   | mixture                                  |                           | radiotherapy and chemotherapy to         |
|             |                                          |                           | enhance the curative effect and reduce   |
|             |                                          |                           | the toxic and side effects for treating  |
|             |                                          |                           | lung cancer, liver cancer, esophageal    |
|             |                                          |                           | cancer, nasopharyngeal cancer, brain     |
|             |                                          |                           | tumor, bone metastasis cancer and other  |
|             |                                          |                           | malignant tumors; interventional         |
|             |                                          |                           | therapy, intracavitary chemotherapy and  |
|             |                                          |                           | treatment of carcinomatous hydrothorax   |
|             |                                          |                           | and ascites; as first-line treatment for |
|             |                                          |                           | malignant pleural effusion, ascites,     |
|             |                                          |                           | brain tumors, respiratory tract and      |
|             |                                          |                           | digestive tract tumors; as second-line   |
|             |                                          |                           | therapy for gynecologic cancer, breast   |
|             |                                          |                           | cancer, skin cancer, bone metastasis,    |
|             |                                          |                           | lymphoma, leukemia, etc..                |
| Shenmai     | <i>Radix Ginseng Rubra,</i>              | Tonifying Qi and          | Shock, coronary heart disease, viral     |
| injection   | <i>Radix Ophiopogonis</i>                | preventing exhaustion,    | myocarditis, chronic pulmonary heart     |
|             |                                          | nourishing Yin and        | disease and neutropenia with deficiency  |
|             |                                          | generating body fluid,    | of Qi and Yin; improve the immune        |
|             |                                          | activating pulse          | function of patients with tumors,        |
|             |                                          |                           | combined with chemotherapy to            |
|             |                                          |                           | enhance the curative effect and reduce   |

|                                                                      |                                                                  |                                                                                                          |                                                                                                                                                                                                                               |
|----------------------------------------------------------------------|------------------------------------------------------------------|----------------------------------------------------------------------------------------------------------|-------------------------------------------------------------------------------------------------------------------------------------------------------------------------------------------------------------------------------|
|                                                                      |                                                                  |                                                                                                          | the toxic and side effects                                                                                                                                                                                                    |
| Disodium cantharidinate and vitamin B6 injection<br>Chansu injection | Disodium cantharidinate and vitamin B6<br><i>Venenum bufonis</i> | Anticarcinogen<br><br>Heat-clearing and detoxicating                                                     | Advanced primary liver cancer and advanced lung cancer<br><br>Acute and chronic suppurative infection; as adjuvant drug for malignant tumors                                                                                  |
| Lentinan injection                                                   | Lentinan                                                         | Immunomodulator                                                                                          | Adjuvant therapy for malignant tumors                                                                                                                                                                                         |
| Ginseng polysaccharide injection                                     | Ginseng polysaccharide                                           | Immunomodulator                                                                                          | Alleviate the side effects of radiotherapy and chemotherapy, adjuvant therapy for tumors; improve the immune function, acute and chronic hepatitis and liver injuries, chronic infections, diabetes and immunological disease |
| Shenfu injection                                                     | <i>Radix Ginseng, Radix Aconiti Carmichaeli</i>                  | Reviving Yang for resuscitation, tonifying Qi and preventing exhaustion                                  | Desertion syndrome caused by excessive Yang Qi desertion (infectious, hemorrhagic and fluid loss shock); deficiency of Yang or Qi with palpitation, cough, stomachache, diarrhea, rheumatism, etc.                            |
| Astragalus polysaccharides injection                                 | Astragalus polysaccharides                                       | Supplementing Qi and tonifying deficiency                                                                | Fatigue, spontaneous sweating, shortness of breath, anorexia of Qi deficiency syndrome; patients with aleucocytosis, low quality of life, and immunocompromise after chemotherapy                                             |
| Astragalus injection                                                 | <i>Astragali Radix</i>                                           | Tonifying Qi and strengthening body resistance, pulseinvigorating and heartnourishing, fortifying spleen | Insufficiency of the heart-qi and blood stasis syndrome of viral myocarditis, cardiac insufficiency; hepatitis with spleen deficiency and dampness syndrome                                                                   |

|                                    |                                                                                                                                                                                |                                                                       |                                                                                                                                                         |
|------------------------------------|--------------------------------------------------------------------------------------------------------------------------------------------------------------------------------|-----------------------------------------------------------------------|---------------------------------------------------------------------------------------------------------------------------------------------------------|
|                                    |                                                                                                                                                                                | and disinhibiting dampness                                            |                                                                                                                                                         |
| Tongkening injection               | <i>Equisetum hiemale</i> ,<br><i>Selaginella tamariscina</i>                                                                                                                   | Heat-clearing and detoxifying, expelling stagnation and relaxing vein | Adjuvant therapy for malignant tumor-induced pain                                                                                                       |
| Wutou injection                    | <i>Radix Aconiti</i> , <i>Radix Aconiti Kusnezoffii</i>                                                                                                                        | tranquilizing and relieving pain                                      | Stomach cancer, liver cancer and other advanced cancers-induced pain                                                                                    |
| Polyporus polysaccharide injection | <i>Grifola</i> polysaccharide                                                                                                                                                  | Immunomodulator                                                       | Combined with antineoplastic drugs, it can enhance the curative effect and a decrease side reactions                                                    |
| Yuanqinzhitong injection           | <i>Corydalis ambigua</i> <i>Ch.</i> , <i>Radix Aconiti Praeparata</i> , <i>Fraxinus bungeana</i> , <i>Radices Stephaniae</i> , <i>Tetrandrae</i> , <i>Chelidonium majus</i> L. | Promoting Qi to activate blood, activating meridians to stop pain     | Moderate cancerous pain caused by Qi stagnation and blood stasis                                                                                        |
| Placental polypeptides injection   | Placental peptide /                                                                                                                                                            |                                                                       | Reduced or dysregulated cellular immunity-induced disease, postoperative healing, viral infection-induced disease, leucopenia caused by various reasons |

---
